# Supplementary material
Source: PubMed Central journal article supplement (PMC4759412)
Supplement: ajtr0008-0012-f8.pdf [file ajtr0008-0012-f8.pdf]

## Salidroside attenuates PAH via AMPK $\alpha$ 1-dependent pathways

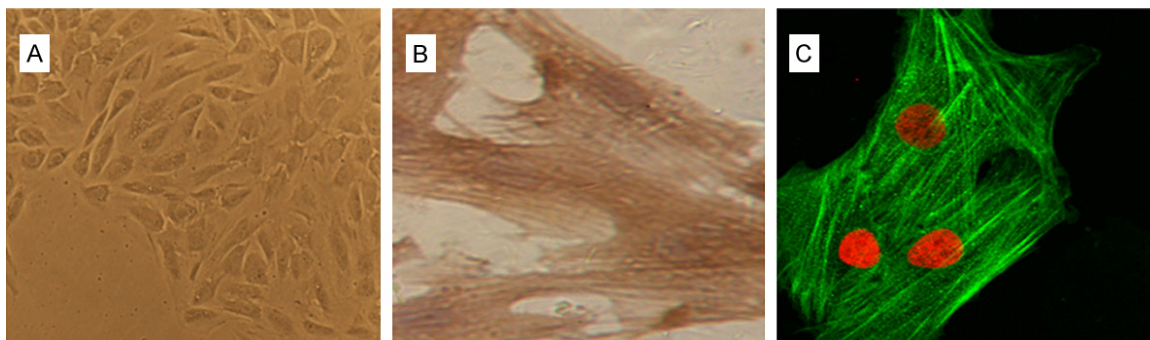

**Figure S1.** Characterization of PASMCs isolated from rats. (A) Morphology of primary PASMCs cells ( $\times 100$ ). Immunocytochemical staining (B) ( $\times 600$ ) and immunofluorescence staining (C) ( $\times 600$ ) with anti- $\alpha$ -SMA antibody were used to identify PASMCs cells ( $\times 400$ ).
